# Supplementary material for: Analysis of the internal motions of thermoresponsive polymers and single chain nanoparticles
Source: Royal Society of Chemistry journal article supplement (doi:10.1039/d4sm01308e), 2025-01-01
Supplement: d4sm01308e1.pdf [file d4sm01308e1.pdf]

# **Electronic Supplementary Information:** Analysis of the Internal Motions of Thermoresponsive Polymers and Single Chain Nanoparticles

Michael J. A. Hore<sup>1</sup>

<sup>1</sup>Department of Macromolecular Science and Engineering, Case Western Reserve  
University, Cleveland, OH 44122, USA.  
hore@case.edu

---

## **Contents**

|          |                                                                                     |          |
|----------|-------------------------------------------------------------------------------------|----------|
| <b>1</b> | <b>Effect of Random Crosslinking on <math>\psi_p</math> and <math>C_p(t)</math></b> | <b>2</b> |
| <b>2</b> | <b>UMAP Procedure for Single Chain NPs</b>                                          | <b>3</b> |
| <b>3</b> | <b>Embedding of SCNPs into Z</b>                                                    | <b>5</b> |
| <b>4</b> | <b>Structural Histograms and KDEs for SCNPs</b>                                     | <b>6</b> |

# 1 Effect of Random Crosslinking on $\psi_p$ and $C_p(t)$

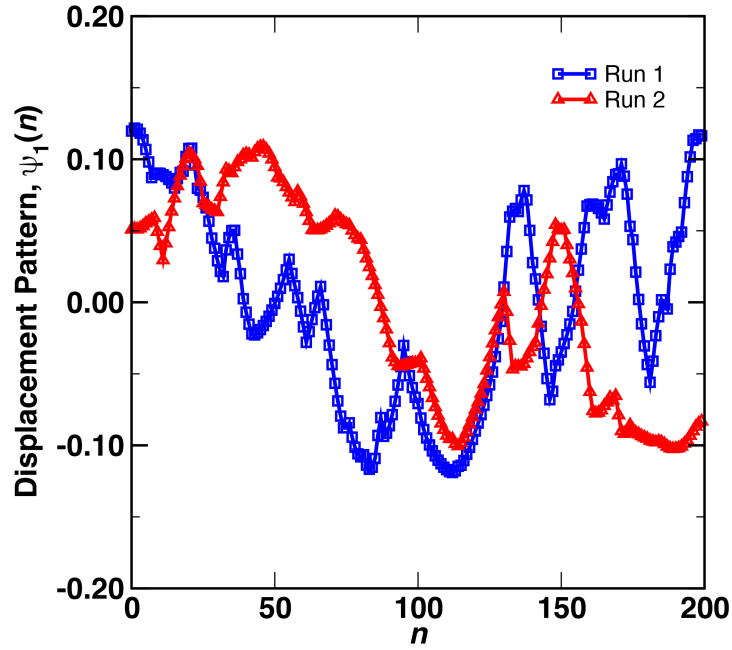

Figure S1: Comparison of the first mode  $\psi_1(n)$  for SCNPs ( $N = 200$  and  $x_c = 15\%$ ) with different pairs of crosslinked monomers. The modes between two independent runs are distinct due to different crosslinking interactions.

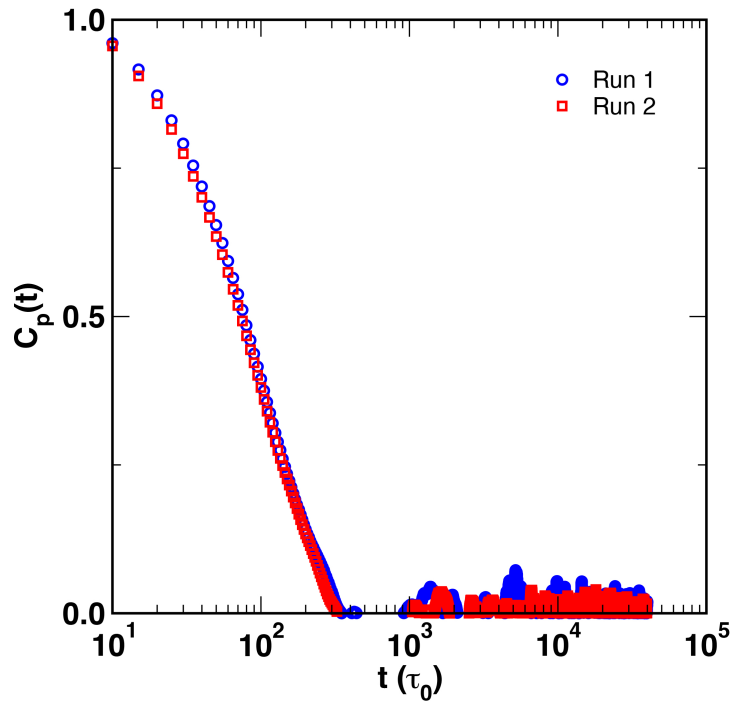

Figure S2: Comparison of the autocorrelation function  $C_p(t)$  ( $p = 1$ ) for SCNPs ( $N = 200$  and  $x_c = 15\%$ ) with different pairs of crosslinked monomers.  $C_p(t)$  is virtually identical between independent runs, despite the modes being distinct from each other as shown in Fig. S1.

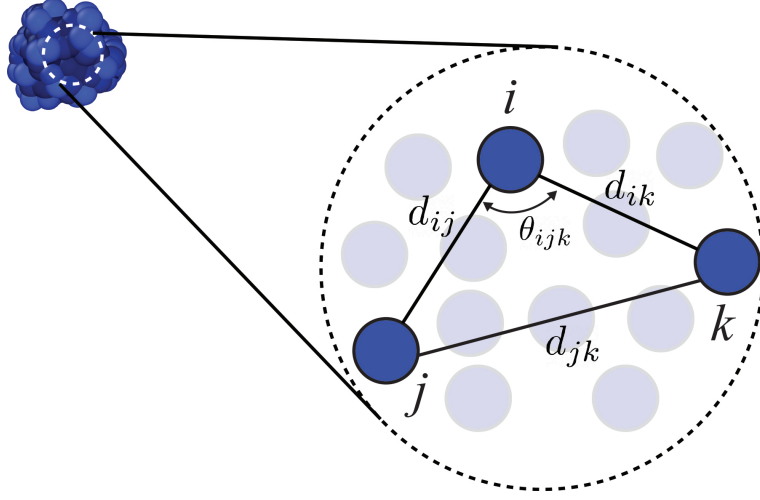

Figure S3: Schematic of the local structural quantities that were computed for each SCNP prior to UMAP.  $d_{ij}$ ,  $d_{ik}$ ,  $d_{jk}$  and  $\theta_{ijk}$  were calculated for all sets of 3-monomers  $\{i, j, k\}$  within the particle.

## 2 UMAP Procedure for Single Chain NPs

Uniform Manifold Approximation & Projection (UMAP) was performed on Gaussian kernel density estimators (KDEs) of local structural information using the `umap-learn` package in Python. This approach was motivated by recent work from Reinhart and coworkers that characterized the self-assembled morphologies of sequence-defined polymers using UMAP.<sup>1,2</sup> Following their approach, the structural quantities  $\theta_{ijk} = \cos^{-1}(\mathbf{r}_{ij} \cdot \mathbf{r}_{ik})$ ,  $d_{ij} = |\mathbf{r}_j - \mathbf{r}_i|$ ,  $d_{ik} = |\mathbf{r}_k - \mathbf{r}_i|$ ,  $d_{jk} = |\mathbf{r}_k - \mathbf{r}_j|$  and  $l_{ijk} = d_{ij} + d_{ik}$  were computed for all possible sets of 3-monomers  $\{i, j, k\}$ , for all SCNP systems, at 500 000 time step intervals during the production phase of the simulations. These values were combined into a single dataset and used to generate histograms of their values (e.g.,  $d_{jk}$  vs.  $\theta_{ijk}$ ). The structural quantities are illustrated in Fig. S3. Next, normalized KDEs ( $L^1$ -norm) were generated from the histograms, examples of which are shown in Fig. S4 for two unique SCNPs ( $N = 50$ ,  $x_c = 10\%$ ) (a) with residual correlations in  $C_p(t)$  and (b) without. The full set of histograms and KDEs is provided in Section 3 of the ESI. Finally, the normalized KDEs for different pairs of structural quantities were used as inputs to the UMAP procedure (`n_neighbors = 5`, `min_dist=0.1`) to embed the SCNP systems into the local structure manifold  $\mathbf{Z}$ . We chose, arbitrarily, to label the axes of the embedding of  $(\theta_{ijk}, d_{jk})$  as  $(Z_0, Z_1)$ , of  $(\theta_{ijk}, l_{ijk})$  as  $(Z_0, Z_2)$ , and of  $(d_{jk}, l_{ijk})$  as  $(Z_1, Z_2)$ ,

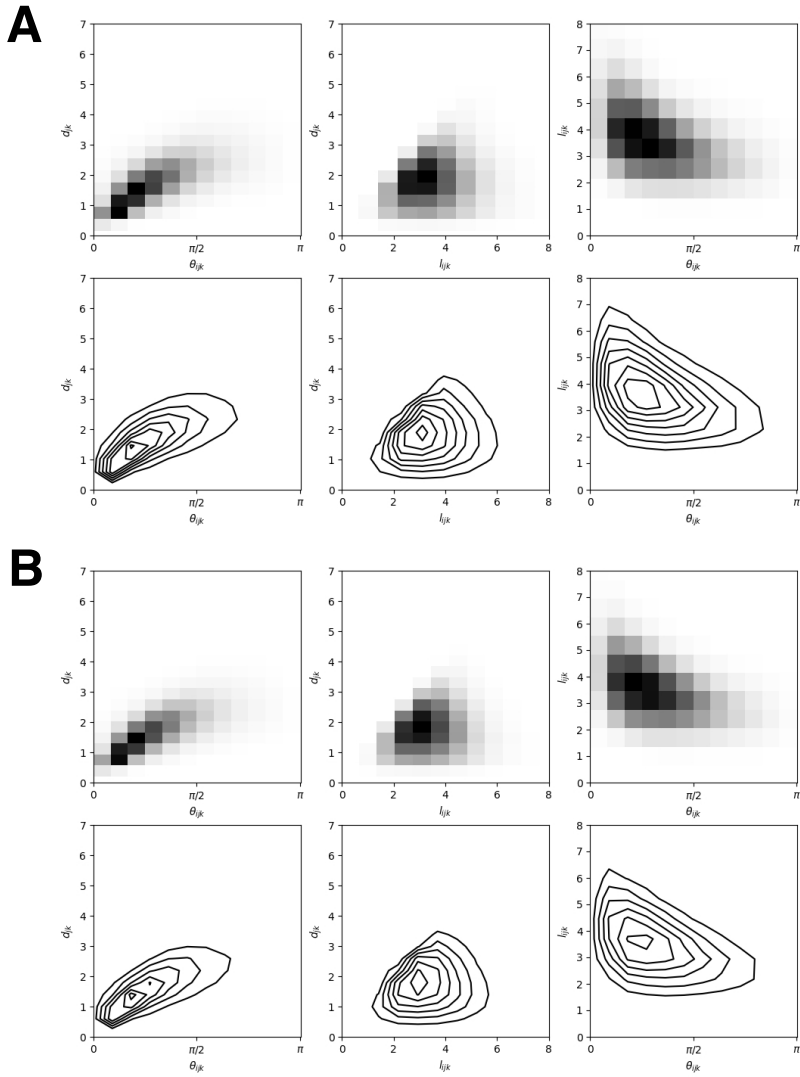

Figure S4: Structural histograms for SCNPs ( $N = 50$ ,  $x_c = 10\%$ ) for (a) a system exhibiting a residual correlation in  $C_p(t)$  and (b) one without. In both (a) and (b), the top row is a histogram for (left to right) pairs of structural quantities  $(\theta_{ijk}, d_{ijk})$ ,  $(l_{ijk}, d_{ijk})$ , and  $(\theta_{ijk}, l_{ijk})$ . The bottom row contains normalized Gaussian kernel density estimations (KDEs) of the histograms.

### 3 Embedding of SCNPs into $\mathbf{Z}$

The full results of the UMAP procedure are presented in Fig. S5 for different projections in  $\mathbf{Z}$ . We found the projection along  $(Z_1, Z_2)$  to most clearly show the similarities between the two classes of particles observed from the simulations.

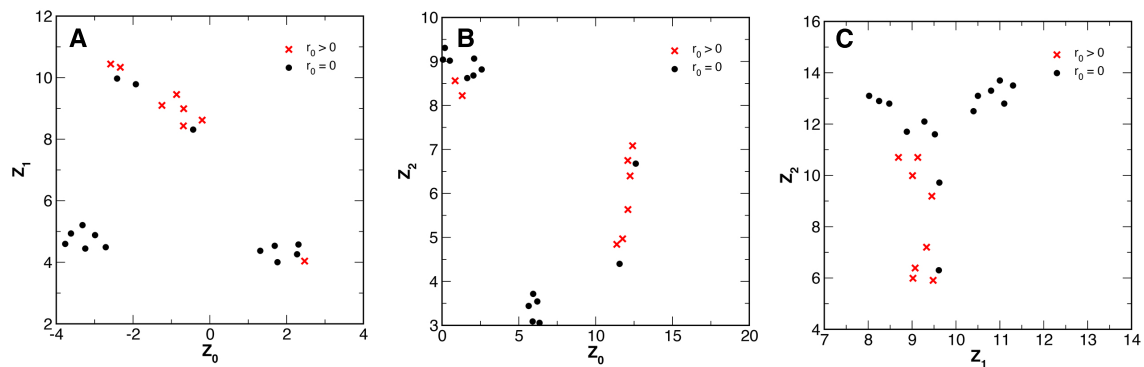

Figure S5: Manifold resulting from embedding (a)  $(\theta_{ijk}, d_{jk})$ , (b)  $(\theta_{ijk}, l_{ijk})$ , and (c)  $(d_{jk}, l_{ijk})$  into  $\mathbf{Z}$ . Red crosses correspond to SCNPs with residual correlations in  $C_p(t)$  while black circles correspond to SCNPs that fully decayed exponentially.

## 4 Structural Histograms and KDEs for SCNPs

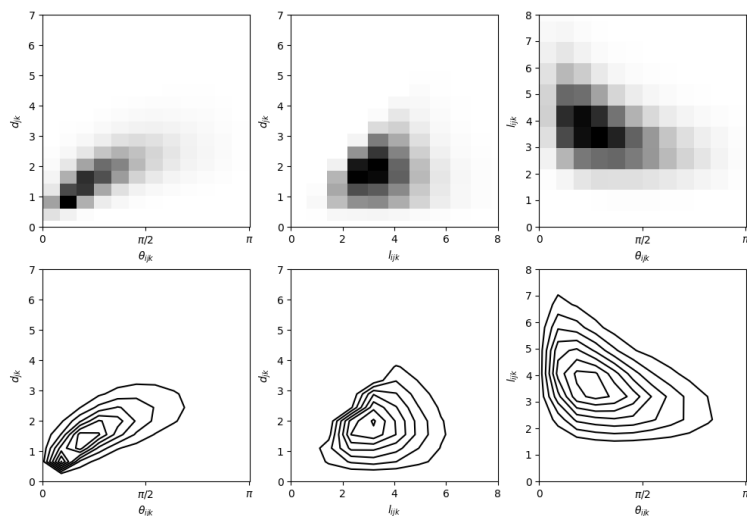

Figure S6: Local structure for SCNP with  $N = 50$  and  $x_c = 2.5\%$  exhibiting long-time correlations in  $C_p(t)$ . The top row contains the histograms obtained from simulation snapshots, while the bottom row contains Gaussian kernel density estimations (KDEs) of the histograms.

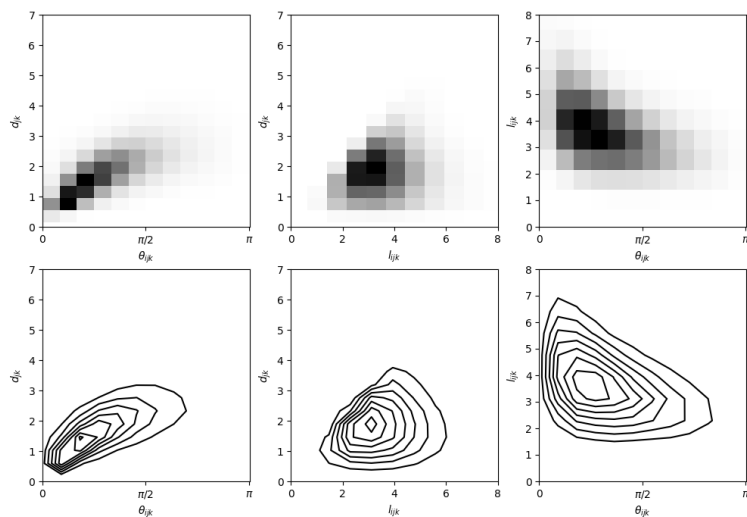

Figure S7: Local structure for SCNP with  $N = 50$  and  $x_c = 10\%$  exhibiting long-time correlations in  $C_p(t)$ . The top row contains the histograms obtained from simulation snapshots, while the bottom row contains Gaussian kernel density estimations (KDEs) of the histograms.

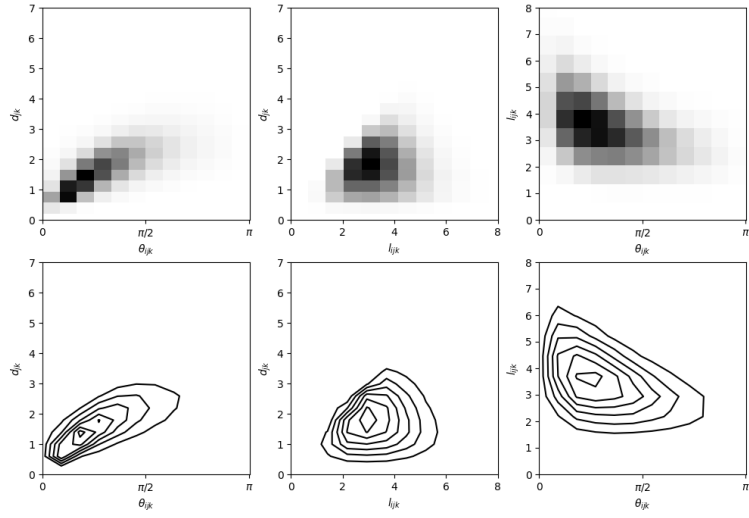

Figure S8: Local structure for SCNP with  $N = 50$  and  $x_c = 10\%$  that does not show long-time correlations in  $C_p(t)$ . The top row contains the histograms obtained from simulation snapshots, while the bottom row contains Gaussian kernel density estimations (KDEs) of the histograms.

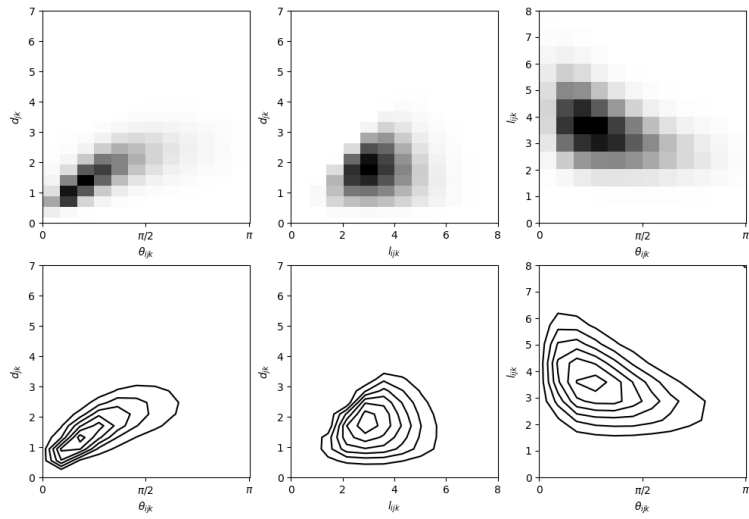

Figure S9: Local structure for SCNP with  $N = 50$  and  $x_c = 15\%$  exhibiting long-time correlations in  $C_p(t)$ . The top row contains the histograms obtained from simulation snapshots, while the bottom row contains Gaussian kernel density estimations (KDEs) of the histograms.

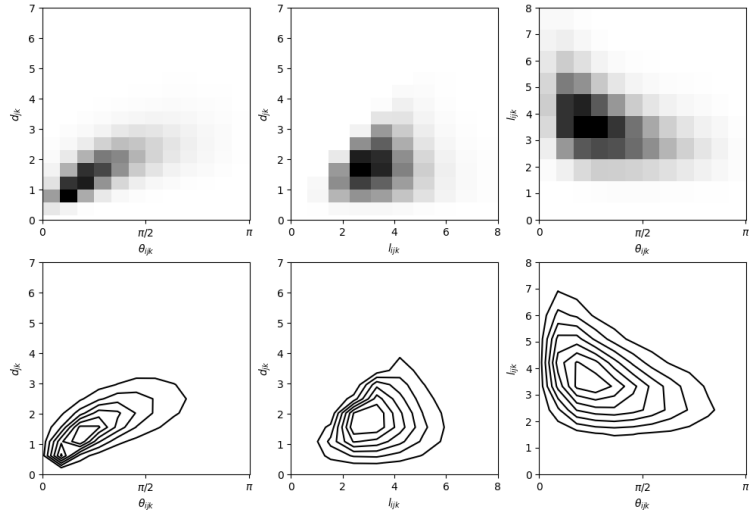

Figure S10: Local structure for SCNP with  $N = 50$  and  $x_c = 15\%$  that does not show long-time correlations in  $C_p(t)$ . The top row contains the histograms obtained from simulation snapshots, while the bottom row contains Gaussian kernel density estimations (KDEs) of the histograms.

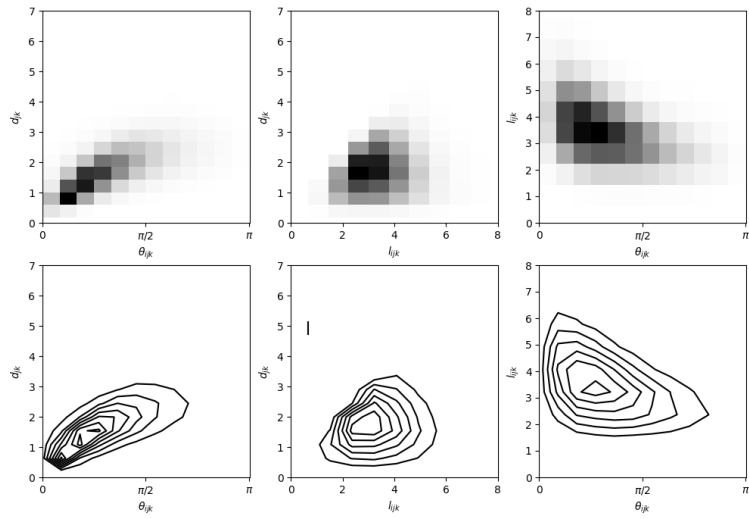

Figure S11: Local structure for SCNP with  $N = 50$  and  $x_c = 20\%$  exhibiting long-time correlations in  $C_p(t)$ . The top row contains the histograms obtained from simulation snapshots, while the bottom row contains Gaussian kernel density estimations (KDEs) of the histograms.



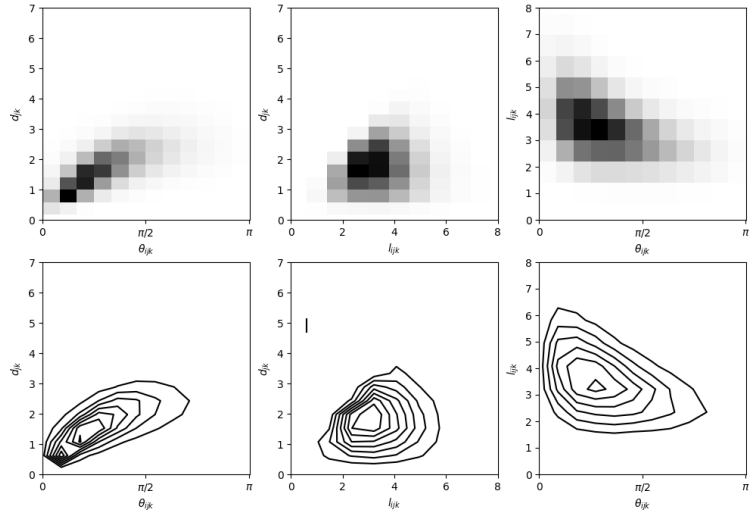

Figure S12: Local structure for SCNP with  $N = 50$  and  $x_c = 20\%$  that does not show long-time correlations in  $C_p(t)$ . The top row contains the histograms obtained from simulation snapshots, while the bottom row contains Gaussian kernel density estimations (KDEs) of the histograms.

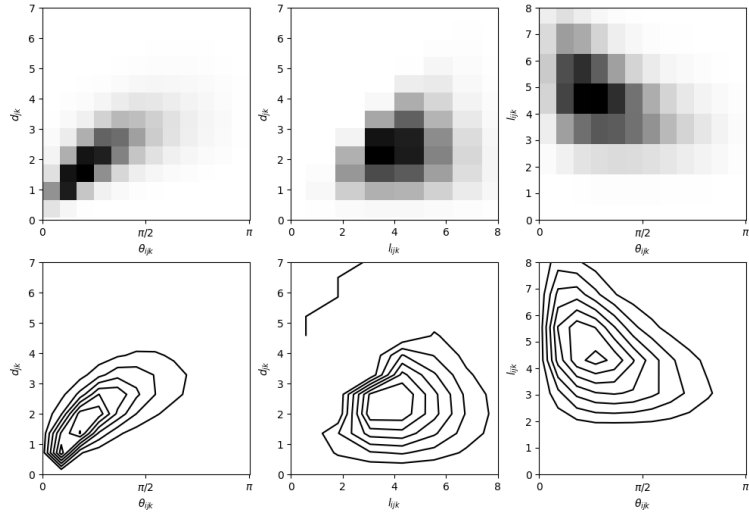

Figure S13: Local structure for SCNP with  $N = 100$  and  $x_c = 2.5\%$  exhibiting long-time correlations in  $C_p(t)$ . The top row contains the histograms obtained from simulation snapshots, while the bottom row contains Gaussian kernel density estimations (KDEs) of the histograms.

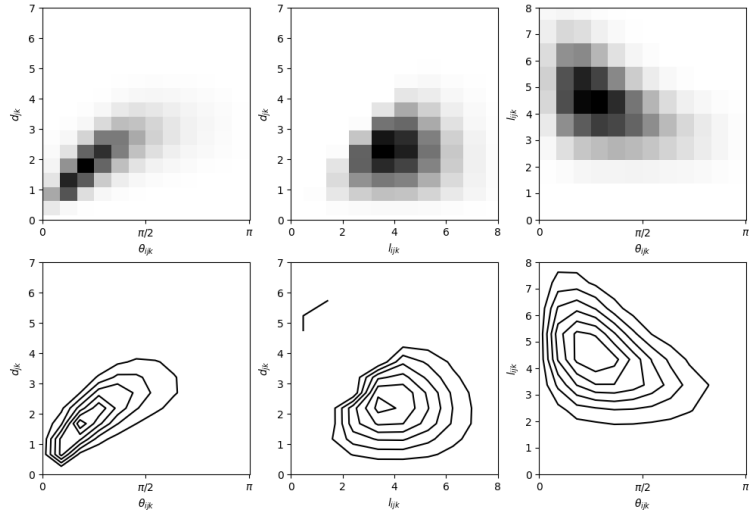

Figure S14: Local structure for SCNP with  $N = 100$  and  $x_c = 10\%$  that does not show long-time correlations in  $C_p(t)$ . The top row contains the histograms obtained from simulation snapshots, while the bottom row contains Gaussian kernel density estimations (KDEs) of the histograms.

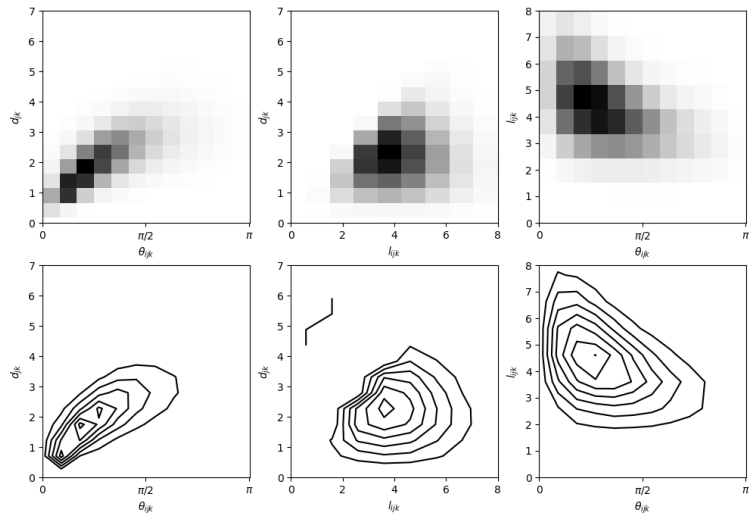

Figure S15: Local structure for SCNP with  $N = 100$  and  $x_c = 15\%$  that does not show long-time correlations in  $C_p(t)$ . The top row contains the histograms obtained from simulation snapshots, while the bottom row contains Gaussian kernel density estimations (KDEs) of the histograms.

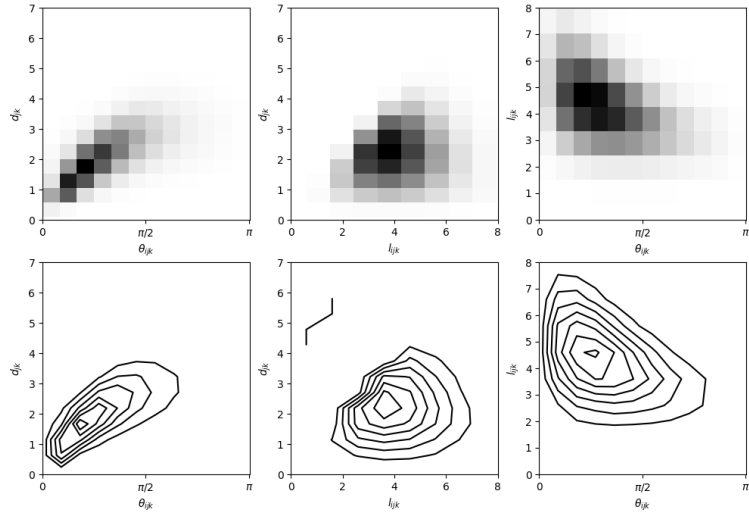

Figure S16: Local structure for SCNP with  $N = 100$  and  $x_c = 20\%$  that does not show long-time correlations in  $C_p(t)$ . The top row contains the histograms obtained from simulation snapshots, while the bottom row contains Gaussian kernel density estimations (KDEs) of the histograms.

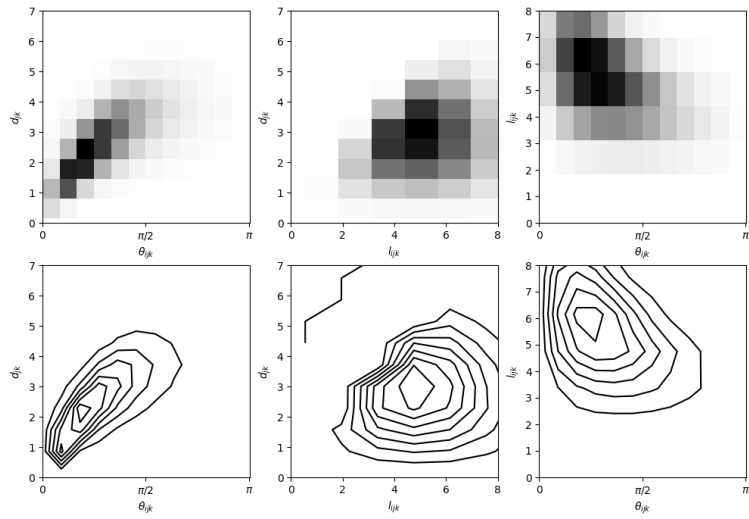

Figure S17: Local structure for SCNP with  $N = 200$  and  $x_c = 2.5\%$  that does not show long-time correlations in  $C_p(t)$ . The top row contains the histograms obtained from simulation snapshots, while the bottom row contains Gaussian kernel density estimations (KDEs) of the histograms.

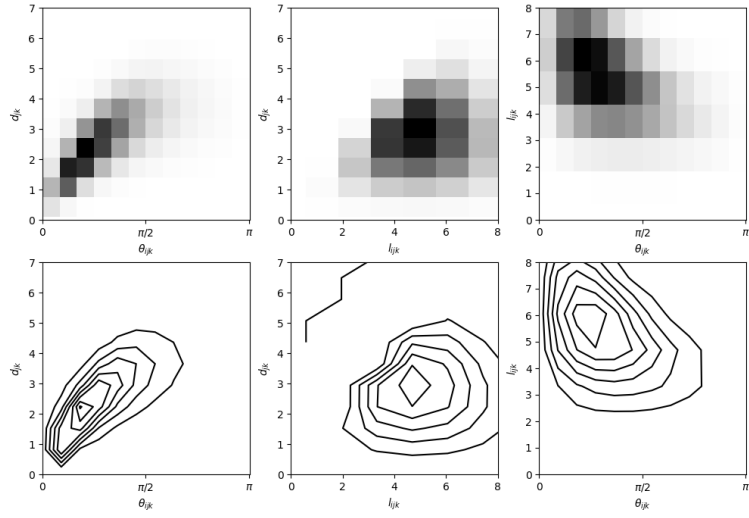

Figure S18: Local structure for SCNP with  $N = 200$  and  $x_c = 10\%$  that does not show long-time correlations in  $C_p(t)$ . The top row contains the histograms obtained from simulation snapshots, while the bottom row contains Gaussian kernel density estimations (KDEs) of the histograms.

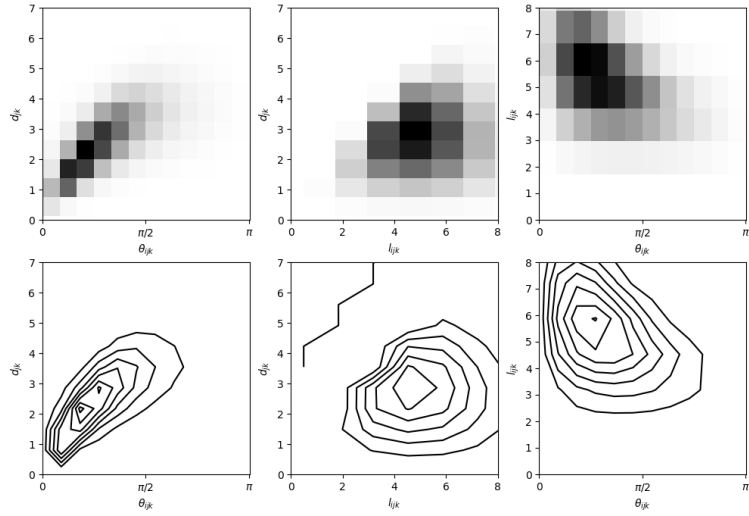

Figure S19: Local structure for SCNP with  $N = 200$  and  $x_c = 15\%$  that does not show long-time correlations in  $C_p(t)$ . The top row contains the histograms obtained from simulation snapshots, while the bottom row contains Gaussian kernel density estimations (KDEs) of the histograms.

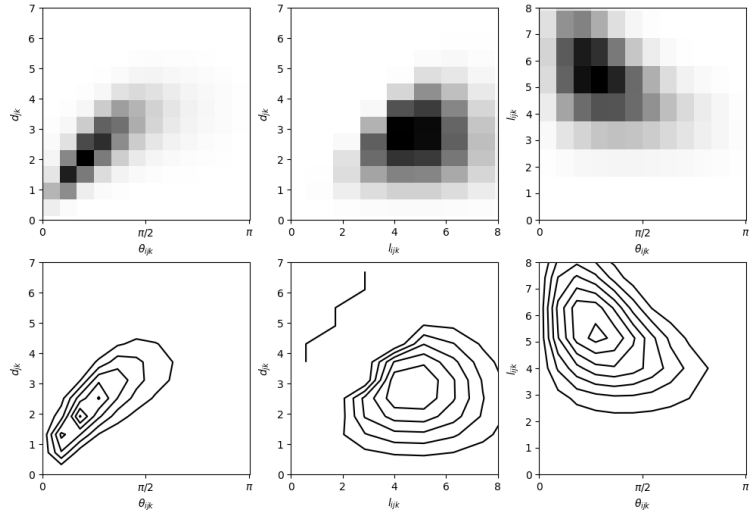

Figure S20: Local structure for SCNP with  $N = 200$  and  $x_c = 20\%$  that does not show long-time correlations in  $C_p(t)$ . The top row contains the histograms obtained from simulation snapshots, while the bottom row contains Gaussian kernel density estimations (KDEs) of the histograms.

## References

- [1] W. F. Reinhart, *Computational Materials Science*, 2021, **196**, 110511.
- [2] A. Statt, D. C. Kleeblatt and W. F. Reinhart, *Soft matter*, 2021, **17**, 7697–7707.
